# Supplementary material
Source: PubMed Central journal article supplement (PMC1533983)
Supplement: plntcell_tpc.105.037192_2.pdf [file plntcell_tpc.105.037192_2.pdf]

**Supplemental Table 1.** Expression ratio of *ARF8* mRNA in various tissues.

|                         | mRNA<br>expression ratio <sup>a</sup> |
|-------------------------|---------------------------------------|
| Stems                   | 1.1 ± 0.1                             |
| Rosette leaves          | 1.1 ± 0.2                             |
| Cauline leaves          | 1.3 ± 0.3                             |
| Flowers buds - anthesis | 1.5 ± 0.1                             |
| Flowers anthesis        | 1.8 ± 0.2                             |
| Siliques (1dpa)         | 2.0 ± 0.4                             |
| Siliques (2dpa)         | 1.6 ± 0.3                             |

<sup>a</sup> The expression ratio of *ARF8* mRNA was determined in *arf8-4* tissues in relation to its expression in the same tissues in the wt line, which was set to 1.0 as the reference point.
