# Supplementary material
Source: PubMed Central journal article supplement (PMC1533983)

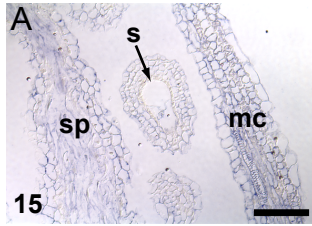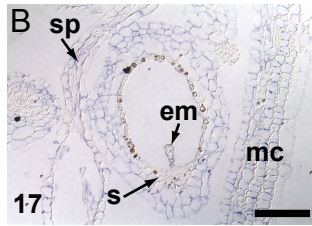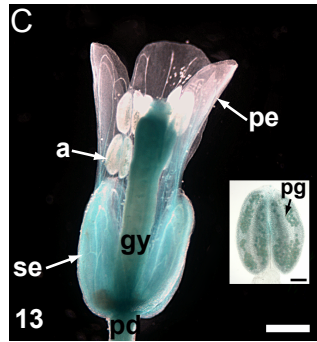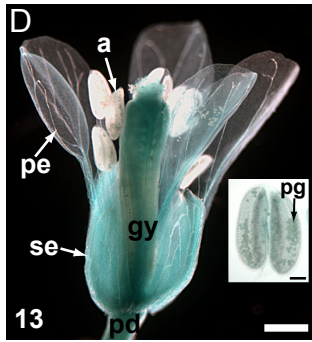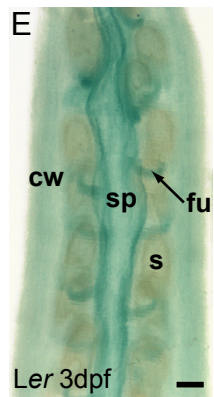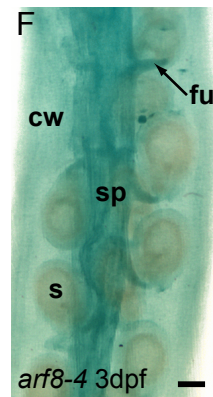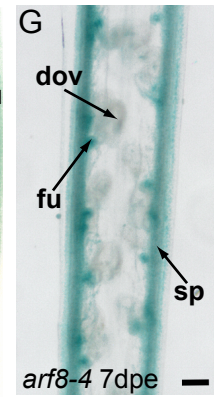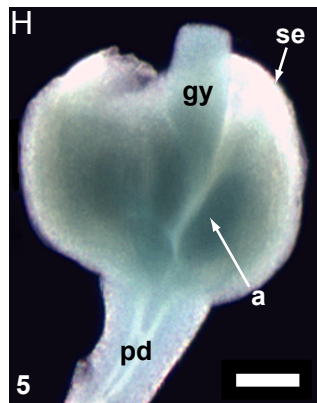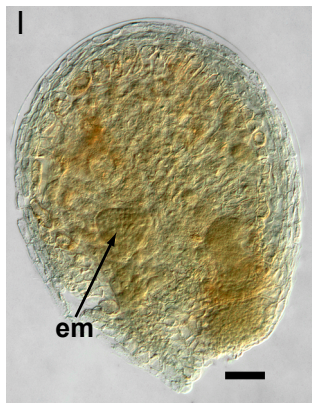

Supplement: plntcell_tpc.105.037192_1.pdf [file plntcell_tpc.105.037192_1.pdf]
